# Supplementary material for: Dementia is associated with medial temporal atrophy even after accounting for neuropathologies
Source: PubMed Central journal article supplement (PMC8952251; doi:10.1093/braincomms/fcac052), 2022-03-07
Supplement: fcac052_supplementary_data.pdf [file fcac052_supplementary_data.pdf]

**Supplementary Figure 1. Flowchart of inclusion criteria for National Alzheimer's Coordinating Center (NACC) participants.**

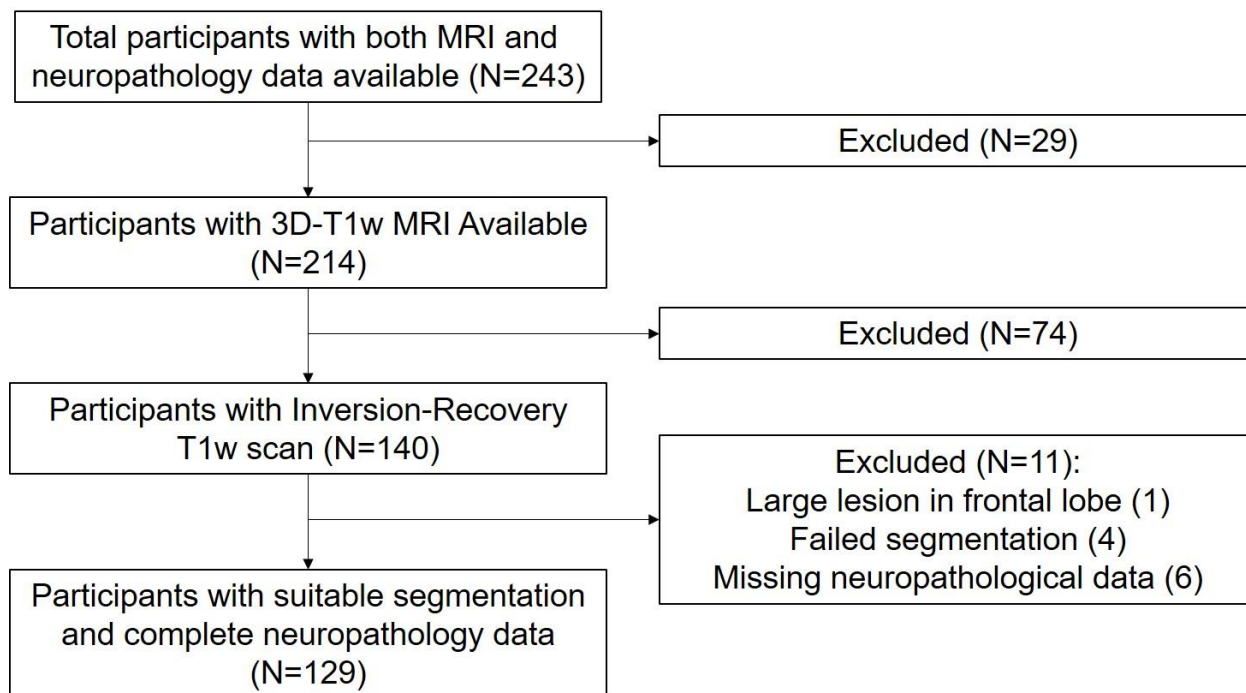

**Supplementary Table 1. Multiple linear regression results for ROI volumes using full severity (CAA and atherosclerosis) or staging (Braak and CERAD) information as continuous variables in the NACC data (N=129).**

| Regions            |                        | Hippocampus  |             |              |                  | Amygdala     |             |              |                  | Parahippocampus |             |              |                  |
|--------------------|------------------------|--------------|-------------|--------------|------------------|--------------|-------------|--------------|------------------|-----------------|-------------|--------------|------------------|
| Variables          | Semi-Part.             | % Var. Exp.  | T-stat      | P-value      | Semi-Part.       | % Var. Exp.  | T-stat      | P-value      | Semi-Part.       | % Var. Exp.     | T-stat      | P-value      |                  |
| <i>Demographic</i> | Dementia Status at MRI | <b>-0.29</b> | <b>8.29</b> | <b>-4.27</b> | <b>&lt;0.001</b> | <b>-0.30</b> | <b>8.94</b> | <b>-4.40</b> | <b>&lt;0.001</b> | <b>-0.27</b>    | <b>7.29</b> | <b>-3.79</b> | <b>&lt;0.001</b> |
|                    | Age                    | <b>-0.26</b> | <b>6.86</b> | <b>-3.89</b> | <b>&lt;0.001</b> | <b>-0.25</b> | <b>6.20</b> | <b>-3.66</b> | <b>&lt;0.001</b> | <b>-0.25</b>    | <b>6.20</b> | <b>-3.50</b> | <b>&lt;0.001</b> |
|                    | Sex                    | 0.03         | 0.11        | 0.49         | 0.6              | -0.03        | 0.07        | -0.38        | 0.7              | -0.13           | 1.74        | -1.86        | 0.07             |
|                    | Years Education        | 0.13         | 1.59        | 1.87         | 0.06             | 0.10         | 1.06        | 1.52         | 0.1              | 0.05            | 0.21        | 0.65         | 0.5              |
|                    | Years MRI to Death     | 0.10         | 1.04        | 1.52         | 0.1              | 0.09         | 0.74        | 1.26         | 0.2              | 0.10            | 0.94        | 1.37         | 0.2              |
|                    | TIV                    | <b>0.18</b>  | <b>3.17</b> | <b>2.64</b>  | <b>0.01</b>      | <b>0.22</b>  | <b>4.67</b> | <b>3.18</b>  | <b>0.002</b>     | 0.13            | 1.72        | 1.85         | 0.07             |
| <i>Pathology</i>   | Braak Stage            | -0.05        | 0.25        | -0.74        | 0.5              | 0.02         | 0.03        | 0.23         | 0.8              | -0.11           | 1.21        | -1.55        | 0.1              |
|                    | CERAD Plaques          | 0.02         | 0.03        | 0.24         | 0.8              | -0.13        | 1.77        | -1.96        | 0.053            | 0.04            | 0.16        | 0.57         | 0.6              |
|                    | HS                     | <b>-0.30</b> | <b>8.70</b> | <b>-4.37</b> | <b>&lt;0.001</b> | <b>-0.20</b> | <b>3.84</b> | <b>-2.89</b> | <b>0.005</b>     | <b>-0.15</b>    | <b>2.10</b> | <b>-2.04</b> | <b>0.044</b>     |
|                    | Lewy Bodies            | -0.04        | 0.13        | -0.53        | 0.6              | <b>-0.15</b> | <b>2.22</b> | <b>-2.19</b> | <b>0.03</b>      | -0.09           | 0.76        | -1.23        | 0.2              |
|                    | CAA                    | -0.04        | 0.15        | -0.59        | 0.6              | 0.09         | 0.83        | 1.34         | 0.2              | 0.05            | 0.29        | 0.77         | 0.4              |
|                    | Atherosclerosis        | -0.06        | 0.41        | -0.95        | 0.3              | -0.05        | 0.21        | -0.67        | 0.5              | -0.05           | 0.29        | -0.77        | 0.4              |
| $R^2$              |                        | 0.49         |             |              |                  | 0.48         |             |              |                  | 0.41            |             |              |                  |

Bold denotes  $P < 0.05$ . TIV: total intracranial volume. ADNP: Alzheimer's disease neuropathology. HS: Hippocampal Sclerosis. CERAD: Consortium to Establish a Registry for Alzheimer's Disease. CAA: Cerebral amyloid angiopathy. Semi-Part.: semi-partial correlation coefficient. Var. Exp.: unique variance explained.

**Supplementary Table 2. Multiple linear regression results for ROI volumes across the various demographic and neuropathological measures, including APOE e4 status, for the NACC data (N=123).**

| Regions     |                        | Hippocampus  |              |              |                  | Amygdala     |             |              |                  | Parahippocampus |             |              |                  |
|-------------|------------------------|--------------|--------------|--------------|------------------|--------------|-------------|--------------|------------------|-----------------|-------------|--------------|------------------|
| Variables   | Semi-Part.             | % Var. Exp.  | T-stat       | P-value      | Semi-Part.       | % Var. Exp.  | T-stat      | P-value      | Semi-Part.       | % Var. Exp.     | T-stat      | P-value      |                  |
| Demographic | Dementia Status at MRI | <b>-0.29</b> | <b>8.24</b>  | <b>-4.22</b> | <b>&lt;0.001</b> | <b>-0.31</b> | <b>9.55</b> | <b>-4.61</b> | <b>&lt;0.001</b> | <b>-0.27</b>    | <b>7.29</b> | <b>-3.67</b> | <b>&lt;0.001</b> |
|             | APOE e4                | -0.13        | 1.59         | -1.86        | 0.07             | <b>-0.17</b> | <b>3.03</b> | <b>-2.59</b> | <b>0.01</b>      | 0.01            | 0.01        | 0.13         | 0.9              |
|             | Age                    | <b>-0.30</b> | <b>8.82</b>  | <b>-4.37</b> | <b>&lt;0.001</b> | <b>-0.25</b> | <b>6.05</b> | <b>-3.67</b> | <b>&lt;0.001</b> | <b>-0.26</b>    | <b>6.55</b> | <b>-3.47</b> | <b>&lt;0.001</b> |
|             | Sex                    | 0.03         | 0.10         | 0.47         | 0.6              | -0.05        | 0.23        | -0.72        | 0.45             | -0.12           | 1.44        | -1.62        | 0.1              |
|             | Years Education        | 0.13         | 1.72         | 1.93         | 0.056            | 0.13         | 1.56        | 1.86         | 0.07             | 0.03            | 0.08        | 0.38         | 0.7              |
|             | Years MRI to Death     | 0.11         | 1.17         | 1.59         | 0.1              | 0.09         | 0.74        | 1.28         | 0.2              | 0.09            | 0.81        | 1.22         | 0.2              |
|             | TIV                    | <b>0.17</b>  | <b>2.96</b>  | <b>2.52</b>  | <b>0.01</b>      | <b>0.18</b>  | <b>3.20</b> | <b>2.67</b>  | <b>0.009</b>     | 0.14            | 2.07        | 1.95         | 0.053            |
| Pathology   | ADNP                   | -0.07        | 0.48         | -1.01        | 0.3              | <b>-0.15</b> | <b>2.25</b> | <b>-2.24</b> | <b>0.03</b>      | -0.05           | 0.28        | -0.72        | 0.5              |
|             | HS                     | <b>-0.32</b> | <b>10.30</b> | <b>-4.72</b> | <b>&lt;0.001</b> | <b>-0.19</b> | <b>3.69</b> | <b>-2.86</b> | <b>0.005</b>     | <b>-0.16</b>    | <b>2.56</b> | <b>-2.17</b> | <b>0.03</b>      |
|             | Lewy Bodies            | -0.04        | 0.14         | -0.55        | 0.6              | <b>-0.14</b> | <b>2.07</b> | <b>-2.14</b> | <b>0.03</b>      | -0.09           | 0.88        | -1.28        | 0.2              |
|             | CAA                    | 0.01         | 0.01         | 0.18         | 0.9              | <b>0.18</b>  | <b>3.06</b> | <b>2.60</b>  | <b>0.01</b>      | 0.03            | 0.08        | 0.39         | 0.7              |
|             | Atherosclerosis        | -0.05        | 0.25         | -0.74        | 0.5              | -0.07        | 0.53        | -1.08        | 0.3              | -0.07           | 0.52        | -0.98        | 0.3              |
| $R^2$       |                        | 0.49         |              |              |                  | 0.51         |             |              |                  | 0.40            |             |              |                  |

Bold denotes  $P < 0.05$ . TIV: total intracranial volume. ADNP: Alzheimer's disease neuropathology. HS: Hippocampal Sclerosis. CERAD: Consortium to Establish a Registry for Alzheimer's Disease. CAA: Cerebral amyloid angiopathy. Semi-Part.: semi-partial correlation coefficient. Var. Exp.: unique variance explained.

Supplementary Table 3. Semi-partial correlation coefficients for ROI volumes using progressively more homogeneous scan subsets.

| Variables          | Regions                | Hippocampus       |                  |                     | Amygdala          |                  |                     | Parahippocampus   |                  |                     |
|--------------------|------------------------|-------------------|------------------|---------------------|-------------------|------------------|---------------------|-------------------|------------------|---------------------|
|                    |                        | All IR<br>(N=129) | MPRAGE<br>(N=74) | MPRAGE<br>3T (N=54) | All IR<br>(N=129) | MPRAGE<br>(N=74) | MPRAGE<br>3T (N=54) | All IR<br>(N=129) | MPRAGE<br>(N=74) | MPRAGE<br>3T (N=54) |
| <i>Demographic</i> | Dementia Status at MRI | <b>-0.28</b>      | <b>-0.39</b>     | <b>-0.35</b>        | <b>-0.29</b>      | <b>-0.34</b>     | <b>-0.30</b>        | <b>-0.28</b>      | <b>-0.35</b>     | <b>-0.29</b>        |
|                    | Age                    | <b>-0.27</b>      | <b>-0.23</b>     | <b>-0.32</b>        | <b>-0.24</b>      | <b>-0.23</b>     | <b>-0.26</b>        | <b>-0.25</b>      | <b>-0.24</b>     | <b>-0.37</b>        |
|                    | Sex                    | 0.05              | -0.02            | -0.02               | -0.04             | -0.02            | 0.00                | -0.12             | -0.10            | -0.02               |
|                    | Years Education        | 0.13              | 0.17             | <b>0.22</b>         | 0.12              | 0.09             | 0.11                | 0.04              | 0.09             | 0.12                |
|                    | Years MRI to Death     | 0.11              | 0.08             | 0.04                | 0.09              | 0.02             | -0.02               | 0.11              | -0.01            | -0.06               |
|                    | TIV                    | <b>0.19</b>       | <b>0.12</b>      | 0.10                | <b>0.19</b>       | <b>0.28</b>      | <b>0.29</b>         | <b>0.15</b>       | <b>0.18</b>      | <b>0.22</b>         |
| <i>Pathology</i>   | ADNP                   | -0.06             | -0.01            | -0.06               | <b>-0.15</b>      | -0.05            | -0.06               | -0.06             | 0.04             | -0.02               |
|                    | HS                     | <b>-0.31</b>      | <b>-0.37</b>     | <b>-0.40</b>        | <b>-0.19</b>      | <b>-0.23</b>     | <b>-0.24</b>        | <b>-0.17</b>      | <b>-0.25</b>     | <b>-0.26</b>        |
|                    | Lewy Bodies            | -0.04             | 0.03             | 0.06                | <b>-0.17</b>      | <b>-0.15</b>     | -0.17               | -0.09             | -0.10            | -0.08               |
|                    | CAA                    | -0.03             | -0.03            | 0.01                | 0.12              | 0.10             | 0.11                | 0.05              | 0.09             | 0.05                |
|                    | Atherosclerosis        | -0.07             | -0.10            | 0.01                | -0.08             | -0.07            | -0.01               | -0.08             | -0.10            | 0.03                |
| $R^2$              | 0.47                   | 0.66              | 0.74             | 0.48                | 0.67              | 0.67             | 0.41                | 0.62              | 0.68             |                     |

Bold denotes  $P < 0.05$ . TIV: total intracranial volume. ADNP: Alzheimer's disease neuropathology. HS: Hippocampal Sclerosis. CAA: Cerebral amyloid angiopathy. IR: inversion recovery. MPRAGE: magnetization-prepared rapid gradient echo.

**Supplementary Table 4. Comparison of semi-partial correlation coefficients for hippocampal volumes estimated using different neuroimaging pipelines in NACC data (N=120).**

| Variables      |                        | Hippocampus  |              |              |
|----------------|------------------------|--------------|--------------|--------------|
|                |                        | VBM          | FS           | ASHS         |
| Demographic    | Dementia Status at MRI | <b>-0.28</b> | <b>-0.25</b> | <b>-0.21</b> |
|                | Age                    | <b>-0.27</b> | <b>-0.23</b> | <b>-0.15</b> |
|                | Sex                    | 0.05         | 0.05         | 0.08         |
|                | Years Education        | 0.08         | 0.09         | 0.16         |
|                | Years MRI to Death     | 0.12         | 0.07         | 0.06         |
|                | TIV                    | <b>0.22</b>  | <b>0.30</b>  | <b>0.26</b>  |
| Pathology      | ADNP                   | -0.06        | -0.07        | -0.03        |
|                | HS                     | <b>-0.32</b> | <b>-0.27</b> | <b>-0.29</b> |
|                | Lewy Bodies            | -0.05        | -0.01        | -0.04        |
|                | CAA                    | -0.06        | -0.01        | -0.02        |
|                | Atherosclerosis        | -0.06        | -0.02        | -0.06        |
| R <sup>2</sup> | 0.45                   | 0.45         | 0.37         |              |

Bold denotes  $P < 0.05$ . TIV: total intracranial volume. ADNP: Alzheimer's Disease Neuropathology. HS: Hippocampal Sclerosis. CAA: Cerebral Amyloid Angiopathy. VBM: Voxel-Based Morphometry estimate from Computational Anatomy Toolbox (CAT12). FS: FreeSurfer Hippocampal Subfield Segmentation. ASHS: Automatic Segmentation of Hippocampal Subfields T1w.

Supplementary Table 5. Comparison of NACC (N=129) and ADNI (N=49) semi-partial correlation coefficients for ROI volumes across the various demographic and neuropathological measures, with dichotomized Braak stages instead of ADNP included in the model.

| Variables      | Dichotomized by Braak Stage V/VI |              | Hippocampus Semi-Part. Corr. |       | Amygdala Semi-Part. Corr. |              | Parahippocampus Semi-Part. Corr. |      |
|----------------|----------------------------------|--------------|------------------------------|-------|---------------------------|--------------|----------------------------------|------|
|                | NACC                             | ADNI         | NACC                         | ADNI  | NACC                      | ADNI         | NACC                             | ADNI |
| Dementia       | <b>-0.35</b>                     | <b>-0.37</b> | <b>-0.33</b>                 | -0.23 | <b>-0.31</b>              | <b>-0.36</b> |                                  |      |
| Age            | <b>-0.37</b>                     | 0.11         | <b>-0.32</b>                 | 0.12  | <b>-0.34</b>              | 0.11         |                                  |      |
| TIV            | <b>0.28</b>                      | 0.21         | <b>0.37</b>                  | 0.15  | <b>0.33</b>               | 0.05         |                                  |      |
| Braak V/VI     | -0.04                            | -0.17        | -0.08                        | -0.25 | -0.08                     | <b>-0.27</b> |                                  |      |
| HS             | <b>-0.28</b>                     | <b>-0.46</b> | <b>-0.18</b>                 | -0.26 | <b>-0.17</b>              | <b>-0.33</b> |                                  |      |
| Lewy Bodies    | -0.04                            | <b>-0.26</b> | <b>-0.16</b>                 | -0.24 | -0.07                     | -0.20        |                                  |      |
| R <sup>2</sup> | 0.43                             | 0.43         | 0.42                         | 0.26  | 0.38                      | 0.37         |                                  |      |

  

| Variables         | Dichotomized by Braak Stage III/IV |              | Hippocampus Semi-Part. Corr. |              | Amygdala Semi-Part. Corr. |              | Parahippocampus Semi-Part. Corr. |      |
|-------------------|------------------------------------|--------------|------------------------------|--------------|---------------------------|--------------|----------------------------------|------|
|                   | NACC                               | ADNI         | NACC                         | ADNI         | NACC                      | ADNI         | NACC                             | ADNI |
| Dementia          | <b>-0.35</b>                       | <b>-0.39</b> | <b>-0.34</b>                 | -0.26        | <b>-0.33</b>              | <b>-0.39</b> |                                  |      |
| Age               | <b>-0.37</b>                       | 0.13         | <b>-0.33</b>                 | 0.15         | <b>-0.34</b>              | 0.13         |                                  |      |
| TIV               | <b>0.28</b>                        | 0.22         | <b>0.37</b>                  | 0.16         | <b>0.33</b>               | 0.07         |                                  |      |
| Braak III/IV/V/VI | -0.06                              | -0.10        | -0.07                        | -0.21        | -0.03                     | -0.20        |                                  |      |
| HS                | <b>-0.28</b>                       | <b>-0.47</b> | <b>-0.18</b>                 | <b>-0.28</b> | <b>-0.17</b>              | <b>-0.35</b> |                                  |      |
| Lewy Bodies       | -0.04                              | <b>-0.27</b> | <b>-0.16</b>                 | -0.26        | -0.06                     | -0.21        |                                  |      |
| R <sup>2</sup>    | 0.43                               | 0.41         | 0.42                         | 0.24         | 0.38                      | 0.33         |                                  |      |

Bold denotes  $P < 0.05$ . TIV: total intracranial volume. HS: Hippocampal Sclerosis. Semi-Part. Corr.: semi-partial correlation coefficient.

**Supplementary Table 6. Comparison of semi-partial correlation coefficients for HS, TDP-43, or both variables in the same model, for ADNI data (N=43).**

| <i>Variables</i>              | <i>Hippocampus Semi-Part. Corr.</i> |               |              | <i>Amygdala Semi-Part. Corr.</i> |               |             | <i>Parahippocampus Semi-Part. Corr.</i> |               |              |
|-------------------------------|-------------------------------------|---------------|--------------|----------------------------------|---------------|-------------|-----------------------------------------|---------------|--------------|
|                               | <i>HS</i>                           | <i>TDP-43</i> | <i>Both</i>  | <i>HS</i>                        | <i>TDP-43</i> | <i>Both</i> | <i>HS</i>                               | <i>TDP-43</i> | <i>Both</i>  |
| <i>Dementia</i>               | <b>-0.35</b>                        | -0.27         | <b>-0.32</b> | -0.21                            | -0.16         | -0.19       | <b>-0.33</b>                            | -0.28         | <b>-0.32</b> |
| <i>Age</i>                    | 0.08                                | -0.01         | 0.07         | 0.18                             | 0.13          | 0.17        | 0.15                                    | 0.09          | 0.15         |
| <i>TIV</i>                    | 0.23                                | 0.19          | 0.24         | 0.20                             | 0.18          | 0.21        | 0.11                                    | 0.07          | 0.11         |
| <i>ADNP</i>                   | -0.15                               | -0.18         | -0.17        | -0.13                            | -0.16         | -0.15       | -0.15                                   | -0.17         | -0.16        |
| <i>HS</i>                     | <b>-0.49</b>                        |               | <b>-0.41</b> | -0.29                            |               | -0.24       | <b>-0.36</b>                            |               | <b>-0.31</b> |
| <i>TDP-43 Hipp.</i>           |                                     | <b>-0.30</b>  | -0.14        |                                  | -0.20         | -0.10       |                                         | -0.20         | -0.08        |
| <i>Lewy Bodies</i>            | <b>-0.26</b>                        | -0.14         | <b>-0.26</b> | -0.28                            | -0.22         | -0.28       | -0.23                                   | -0.14         | -0.23        |
| <i>Adjusted R<sup>2</sup></i> | <b>0.33</b>                         | 0.15          | <b>0.33</b>  | 0.12                             | 0.06          | 0.10        | <b>0.21</b>                             | 0.11          | <b>0.20</b>  |

Bold denotes P<0.05. TIV: total intracranial volume. ADNP: Alzheimer's Disease Neuropathology. HS: Hippocampal Sclerosis. Semi-Part. Corr.: semi-partial correlation coefficient. TDP-43: TAR DNA-binding protein 43. Hipp.: Hippocampus.
